# Supplementary material
Source: MDPI journal article supplement (https://www.mdpi.com/2297-8739/10/7/379)
Supplement: s1 [file s1]

**Table S1. The greenness report sheet of the developed assay containing individual score by following GAC criteria.**

| Criteria                                                                                                                             | Score | Weight |
|--------------------------------------------------------------------------------------------------------------------------------------|-------|--------|
| 1. Direct analytical techniques should be applied to avoid sample treatment.                                                         | 0.3   | 3      |
| 2. Minimal sample size and minimal number of samples are goals.                                                                      | 0.92  | 4      |
| 3. If possible, measurements should be performed in situ.                                                                            | 0.66  | 2      |
| 4. Integration of analytical processes and operations saves energy and reduces the use of reagents.                                  | 1.0   | 3      |
| 5. Automated and miniaturized methods should be selected.                                                                            | 0.75  | 2      |
| 6. Derivatization should be avoided.                                                                                                 | 1.0   | 3      |
| 7. Generation of a large volume of analytical waste should be avoided, and proper management of analytical waste should be provided. | 0.95  | 2      |
| 8. Multi-analyte or multi-parameter methods are preferred versus methods using one analyte at a time.                                | 1.0   | 2      |
| 9. The use of energy should be minimized.                                                                                            | 0.0   | 2      |
| 10. Reagents obtained from renewable sources should be preferred.                                                                    | 0.5   | 2      |
| 11. Toxic reagents should be eliminated or replaced.                                                                                 | 1.0   | 4      |
| 12. Operator's safety should be increased.                                                                                           | 0.8   | 3      |

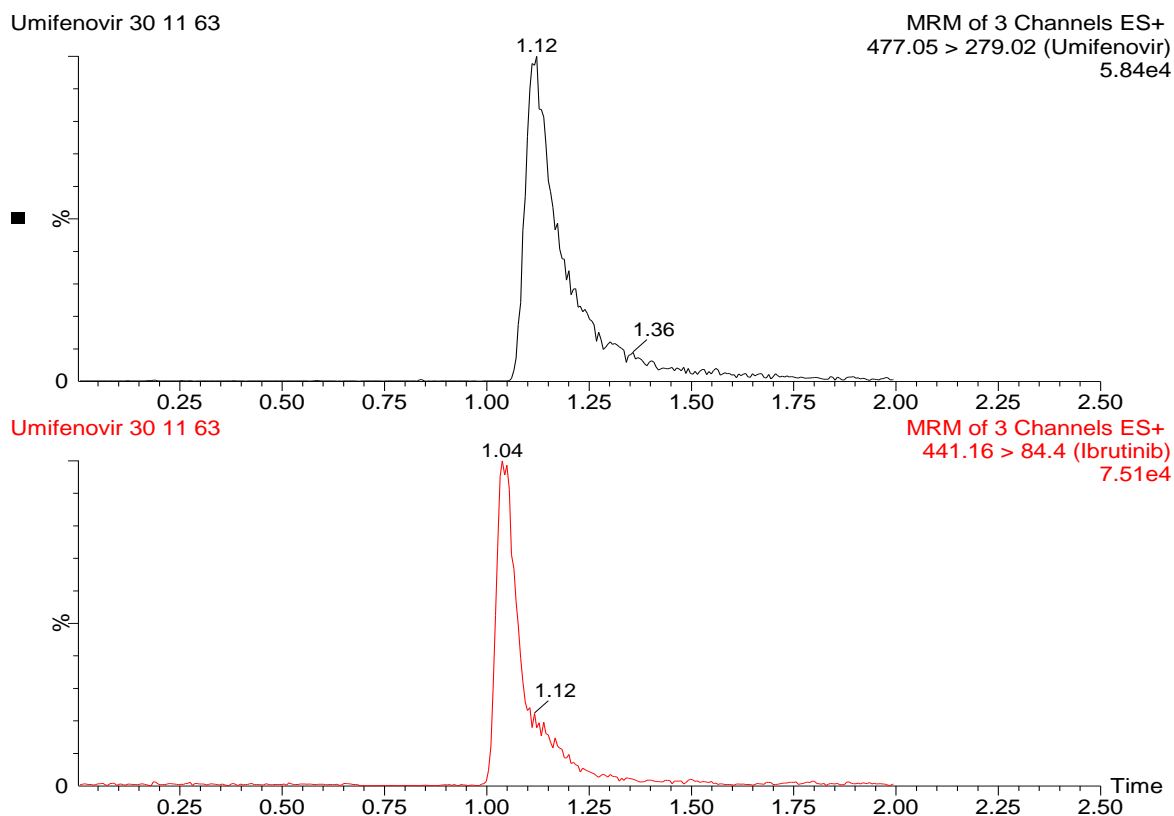

**Figure S1: The representative chromatogram of umifenovir and IS (ibrutinib) obtained with Acquity BEH column of 2.1x150 ;1.7  $\mu$ m**

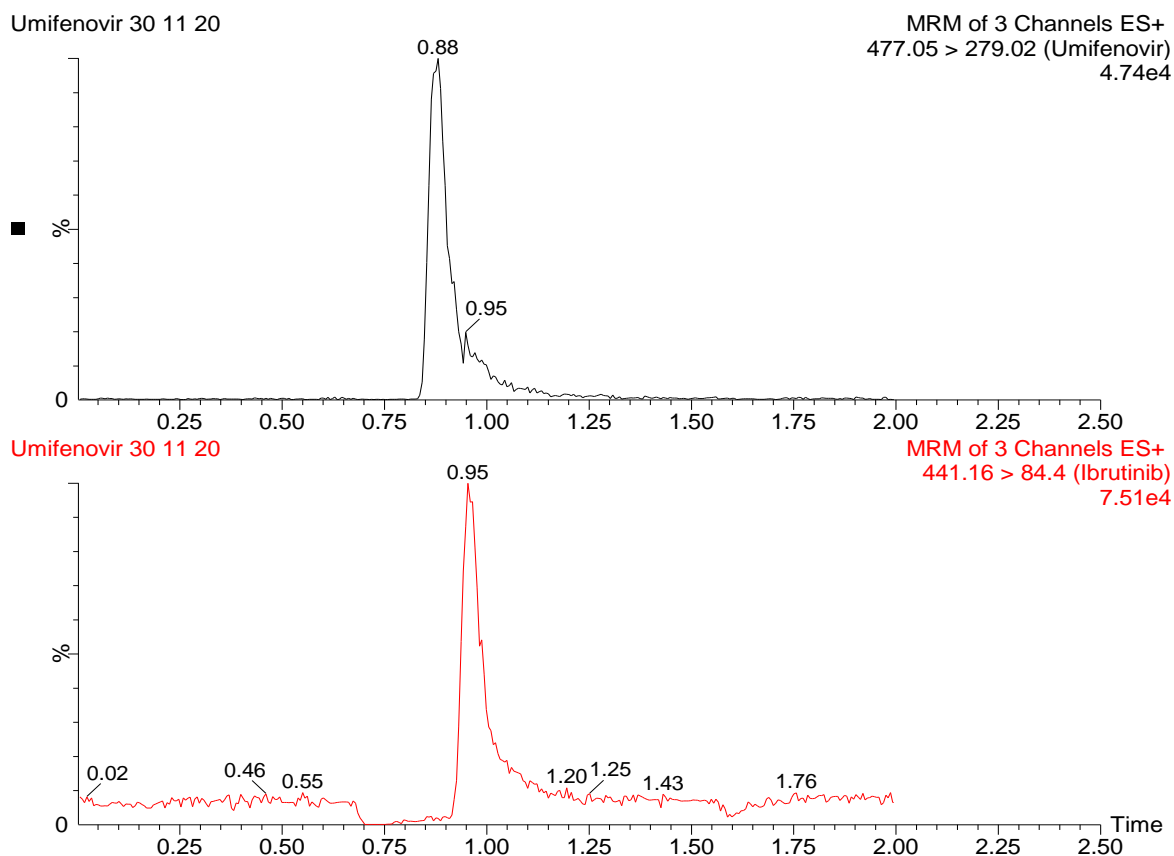

**Figure S2: The representative chromatogram of umifenovir and IS (ibrutinib) obtained with Acquity CSH column of 2.1x100 ;1.7  $\mu$ m**

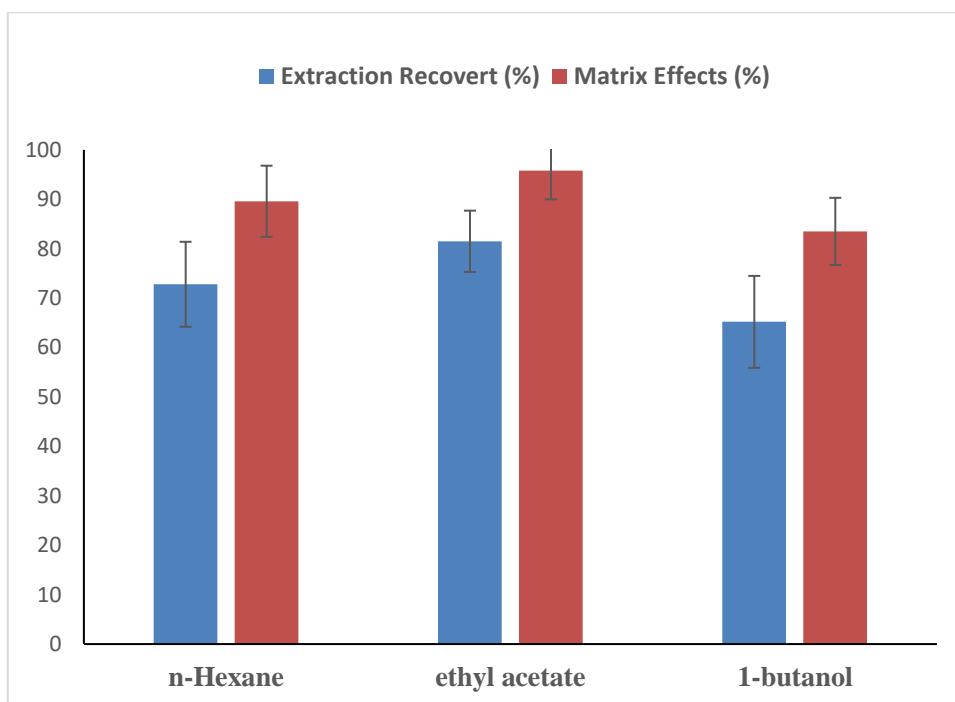

**Figure S3: The comparative extraction recovery (%) and matrix effects (%) data of different extracting solvents obtained during sample preparation optimization.**
